# Supplementary material
Source: Royal Society of Chemistry journal article supplement (doi:10.1039/d6re00057f)
Supplement: d6re00057f1.pdf [file d6re00057f1.pdf]

# **Low-Temperature Standard-SCR over Cu-SSZ-13: Selective Inhibition of the Oxidation Half-Cycle by Mild Hydrothermal Aging**

Andrea Gjetja<sup>1</sup>, Nicola Usberti<sup>1</sup>, Nicole Daniela Nasello<sup>1</sup>,  
Umberto Iacobone<sup>1</sup>, Isabella Nova<sup>1</sup>, Enrico Tronconi<sup>1\*</sup>,  
Rohil Daya<sup>2</sup>, Lai Wei<sup>2</sup>, Hongmei An<sup>2</sup>, Krishna Kamasamudram<sup>2</sup>

<sup>1</sup>Laboratory of Catalysis and Catalytic Processes, Dipartimento di Energia,  
Politecnico di Milano – Via La Masa, 34, Milan, 20156, Italy

<sup>2</sup>Cummins Inc. – 1900 McKinley Avenue, Columbus, Indiana 47201, USA

## **Supplementary Information**

\*To whom correspondence should be addressed:

Telephone: +39 02 2399 3264

E-mail: [enrico.tronconi@polimi.it](mailto:enrico.tronconi@polimi.it)

## 1. Characterization

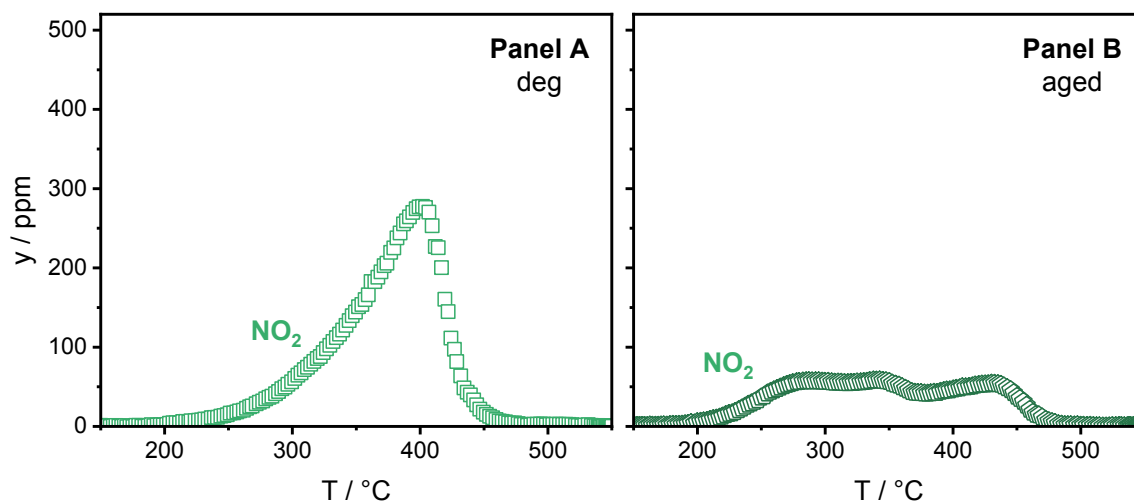

**Figure SI.1** – NO<sub>2</sub> TPD outlet profiles from NO<sub>2</sub> adsorption + TPD protocol. Panels: A) Degreened sample, B) Aged sample. Pretreatment feed: GHSV = 266,250 cm<sup>3</sup> h<sup>-1</sup> g<sub>cat</sub><sup>-1</sup> (STP), T = 550 °C; O<sub>2</sub> = 8.0 % v/v in He. Adsorption feed: GHSV = 266,250 cm<sup>3</sup> h<sup>-1</sup> g<sub>cat</sub><sup>-1</sup> (STP), T = 150 °C; NO<sub>2</sub> = 500 ppm in He. TPD: GHSV = 266,250 cm<sup>3</sup> h<sup>-1</sup> g<sub>cat</sub><sup>-1</sup> (STP), T = 150-550 °C at 2 °C min<sup>-1</sup>; feed: He only.

## 2. Reduction Half-Cycle

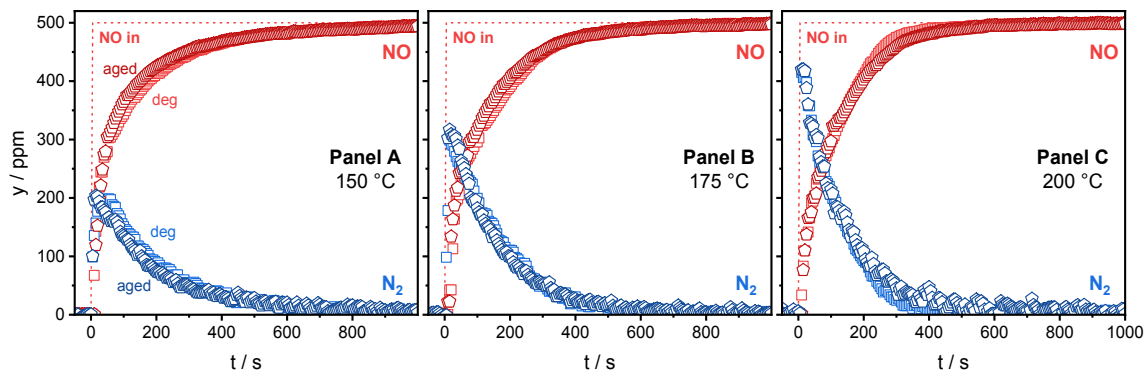

**Figure SI.2** – NO and N<sub>2</sub> transient outlet profiles from RHC protocol: direct comparison of experimental data on Degreened and Aged samples. Panels: A) 150 °C, B) 175 °C, C) 200 °C. Legend: squares for deg, pentagons for aged. Feed: GHSV = 450,000 cm<sup>3</sup> h<sup>-1</sup> g<sub>cat</sub><sup>-1</sup> (STP); NO = 500 ppm, NH<sub>3</sub> = 500 ppm and H<sub>2</sub>O = 2.0 % v/v in He.

| Reduction Half-Cycle | NO consumed / μmol |      | N <sub>2</sub> produced / μmol |      |
|----------------------|--------------------|------|--------------------------------|------|
|                      | Degreened          | Aged | Degreened                      | Aged |
| 150 °C               | 11.2               | 11.3 | 10.9                           | 11.2 |
| 175 °C               | 11.9               | 11.5 | 11.8                           | 11.4 |
| 200 °C               | 10.7               | 11.3 | 10.8                           | 10.8 |

**Table SI.1** – Experimental NO consumption and N<sub>2</sub> production during RHC protocol over the Degreened and the Aged samples at the three studied temperatures: 150, 175, and 200 °C. Feed: GHSV = 450,000 cm<sup>3</sup> h<sup>-1</sup> g<sub>cat</sub><sup>-1</sup> (STP); NO = 500 ppm, NH<sub>3</sub> = 500 ppm and H<sub>2</sub>O = 2.0 % v/v in He.

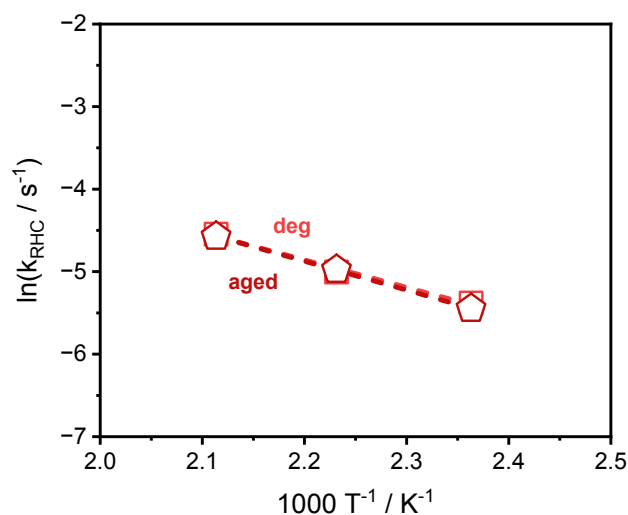

**Figure SI.3** – RHC Arrhenius plot of Degreened and Aged samples. Legend: squares for deg, pentagons for aged. Activation energy: 27.7 ± 2.5 kJ mol<sup>-1</sup> for Degreened, 29.1 ± 0.5 kJ mol<sup>-1</sup> for Aged sample.

### 3. Oxidation Half-Cycle

| OHC at 150 °C<br>t / s | NO consumed / $\mu\text{mol}$ |      | N <sub>2</sub> produced / $\mu\text{mol}$ |      |
|------------------------|-------------------------------|------|-------------------------------------------|------|
|                        | Degreened                     | Aged | Degreened                                 | Aged |
| 60                     | 1.6                           | 1.0  | 1.7                                       | 0.8  |
| 120                    | 3.0                           | 1.6  | 3.1                                       | 1.7  |
| 180                    | 3.8                           | 2.1  | 3.7                                       | 2.1  |
| 420                    | 5.8                           | 3.2  | 5.6                                       | 3.1  |
| 900                    | 8.3                           | 5.4  | 8.2                                       | 5.6  |
| 3600                   | 10.8                          | 8.6  | 10.9                                      | 8.3  |

**Table SI.2** – Experimental NO consumption and N<sub>2</sub> production during OHC protocol over the Degreened and the Aged samples at 150 °C. Reduction feed: GHSV = 450,000 cm<sup>3</sup> h<sup>-1</sup> g<sub>cat</sub><sup>-1</sup> (STP); NO = 500 ppm, NH<sub>3</sub> = 500 ppm and H<sub>2</sub>O = 2.0 % v/v in He. Oxidation feed: GHSV = 450,000 cm<sup>3</sup> h<sup>-1</sup> g<sub>cat</sub><sup>-1</sup> (STP); O<sub>2</sub> = 1.0 % v/v and H<sub>2</sub>O = 2.0 % v/v in He.

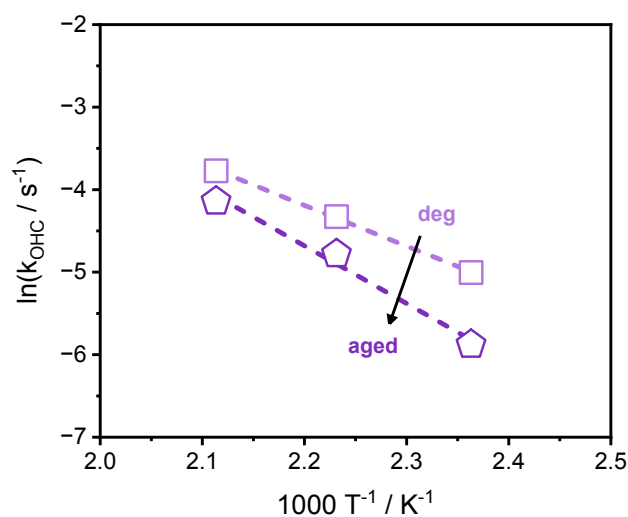

**Figure SI.4** – OHC Arrhenius plot of Degreened and Aged samples. Legend: squares for deg, pentagons for aged. Activation energy: 41.1 ± 1.0 kJ mol<sup>-1</sup> for Degreened, 58.0 ± 6.9 kJ mol<sup>-1</sup> for Aged sample.

#### 4. Combination of RHC and OHC in the Standard-SCR

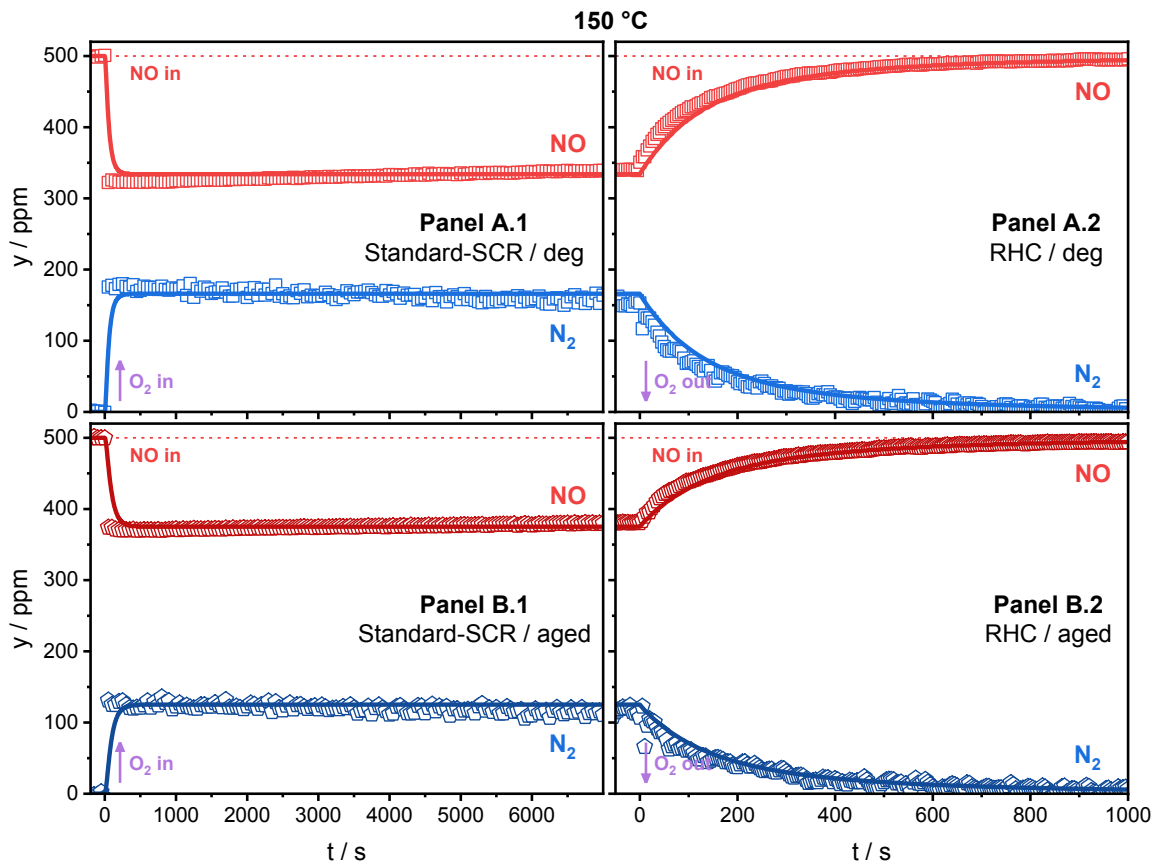

**Figure SI.5** – NO and N<sub>2</sub> transient outlet profiles from the Standard-SCR protocol on Degreened and Aged samples at 150 °C. Panels: A) Degreened, B) Aged, 1) Standard-SCR, 2) RHC following Standard-SCR. Symbols: experimental data (red for NO, blue for N<sub>2</sub>, squares for deg, pentagons for aged). Solid lines: model fit. Feed: GHSV = 450,000 cm<sup>3</sup> h<sup>-1</sup> g<sub>cat</sub><sup>-1</sup> (STP); NO = 500 ppm, NH<sub>3</sub> = 500 ppm, O<sub>2</sub> = 8.0-0.0 % v/v and H<sub>2</sub>O = 2.0 % v/v in He.

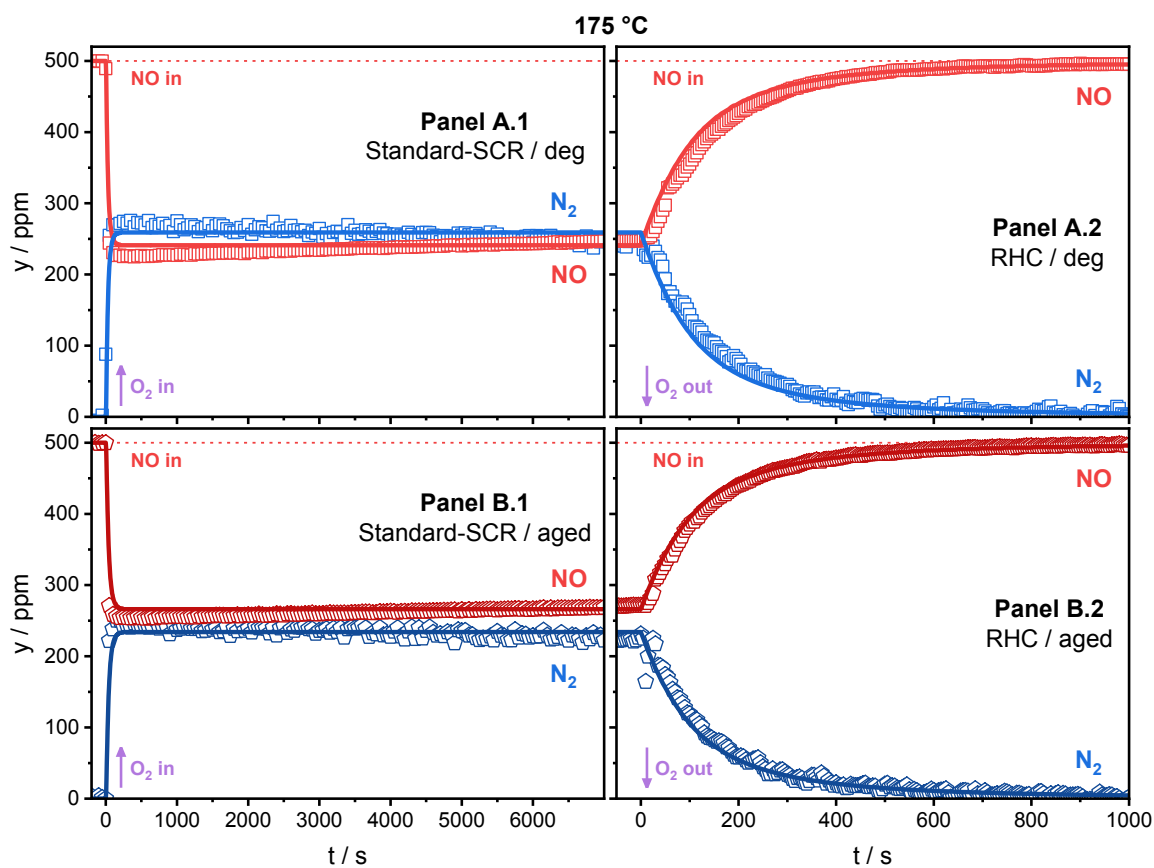

**Figure SI.6**– NO and N<sub>2</sub> transient outlet profiles from the Standard-SCR protocol on Degreened and Aged samples at 175 °C. Panels: A) Degreened, B) Aged, 1) Standard-SCR, 2) RHC following Standard-SCR. Symbols: experimental data (red for NO, blue for N<sub>2</sub>, squares for deg, pentagons for aged). Solid lines: model fit. Feed: GHSV = 450,000 cm<sup>3</sup> h<sup>-1</sup> g<sub>cat</sub><sup>-1</sup> (STP); NO = 500 ppm, NH<sub>3</sub> = 500 ppm, O<sub>2</sub> = 8.0-0.0 % v/v and H<sub>2</sub>O = 2.0 % v/v in He.

## 5. Oxygen-based recovery of activity

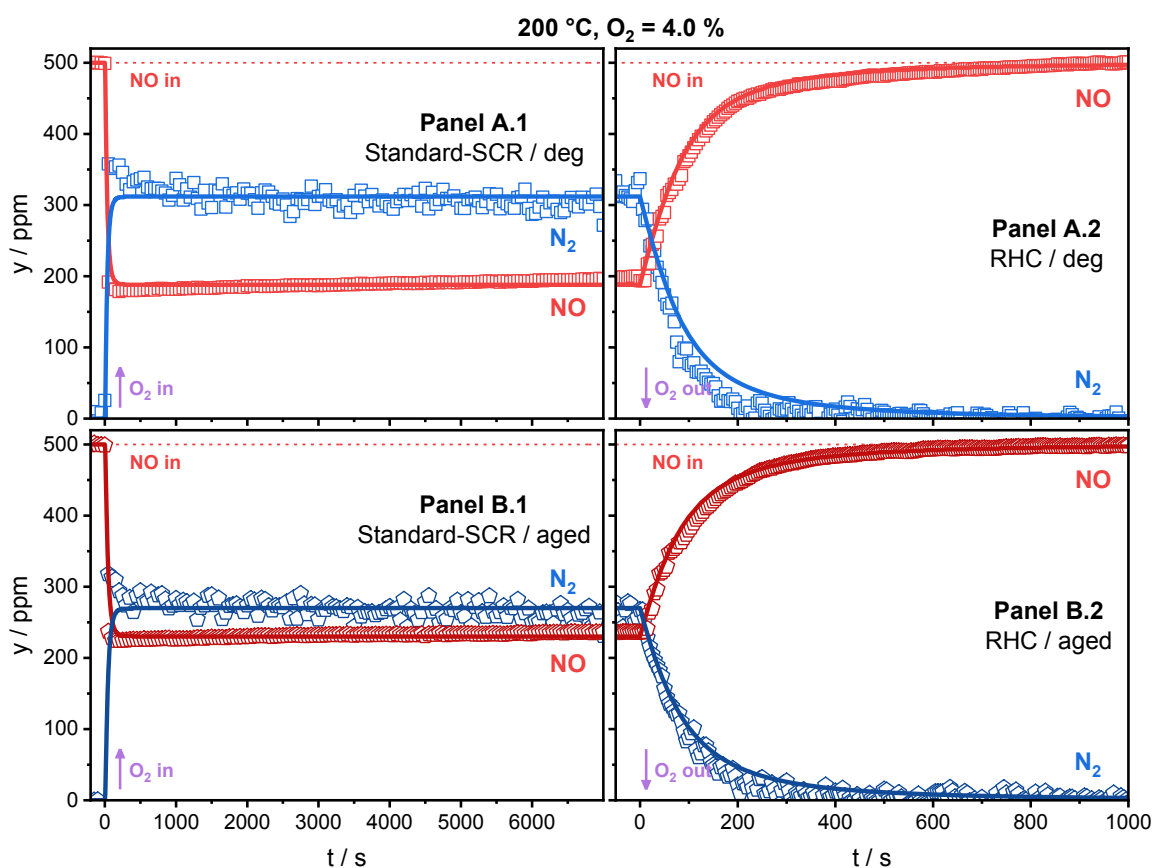

**Figure SI.7** – NO and N<sub>2</sub> transient outlet profiles from Standard-SCR protocol on Degreened and Aged samples at 200 °C and 4.0 % of O<sub>2</sub>. Panels: A) Degreened, B) Aged, 1) Standard-SCR, 2) RHC following Standard-SCR. Symbols: experimental data (red for NO, blue for N<sub>2</sub>, squares for deg, pentagons for aged). Solid lines: model fit. Feed: GHSV = 450,000 cm<sup>3</sup> h<sup>-1</sup> g<sub>cat</sub><sup>-1</sup> (STP); NO = 500 ppm, NH<sub>3</sub> = 500 ppm, O<sub>2</sub> = 4.0-0.0 % v/v and H<sub>2</sub>O = 2.0 % v/v in He.

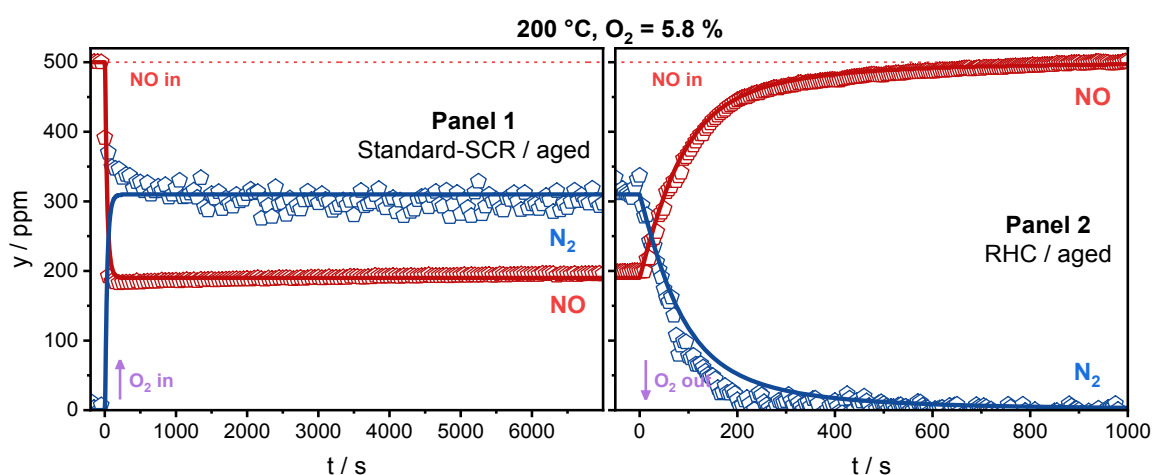

**Figure SI.8** – NO and N<sub>2</sub> transient outlet profiles from Standard-SCR protocol on Aged sample at 200 °C and 5.8 % of O<sub>2</sub>. Panels: 1) Standard-SCR, 2) RHC following Standard-SCR. Symbols: experimental data (red for NO, blue for N<sub>2</sub>). Solid lines: model fit. Feed: GHSV = 450,000 cm<sup>3</sup> h<sup>-1</sup> g<sub>cat</sub><sup>-1</sup> (STP); NO = 500 ppm, NH<sub>3</sub> = 500 ppm, O<sub>2</sub> = 5.8-0.0 % v/v and H<sub>2</sub>O = 2.0 % v/v in He.

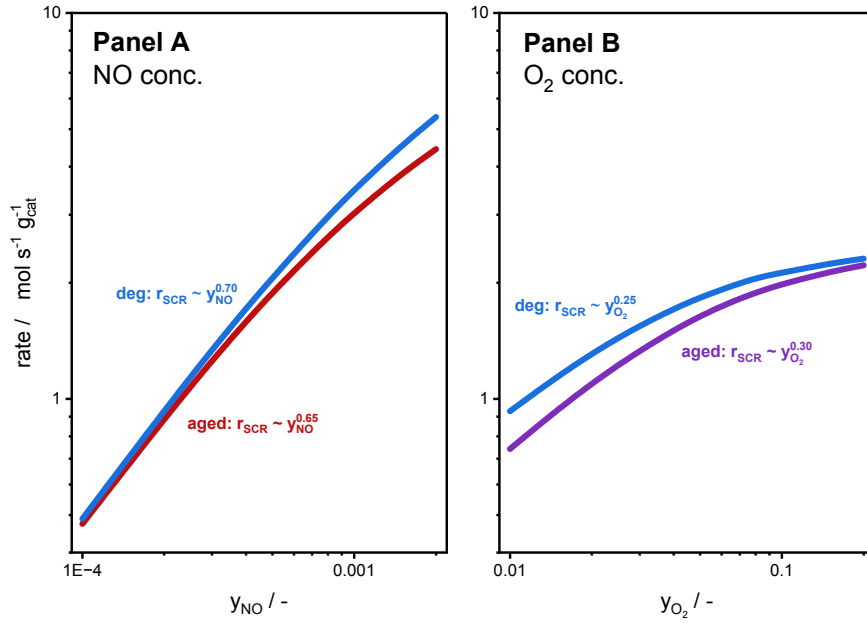

**Figure SI.9** – Simulated NO conversion rates at 200 °C as a function of (1) NO concentration and (2) O<sub>2</sub> concentration. Feed: GHSV = 450,000 cm<sup>3</sup> h<sup>-1</sup> g<sub>cat</sub><sup>-1</sup> (STP); NO = 500 ppm, NH<sub>3</sub> = 500 ppm, O<sub>2</sub> = 8.0 % v/v and H<sub>2</sub>O = 2.0 % v/v in He, except as noted. The colored full lines correspond to the simulated rates, while the black dotted curves correspond to the fit of the rates with a  $r = ky^\alpha$  type equation.

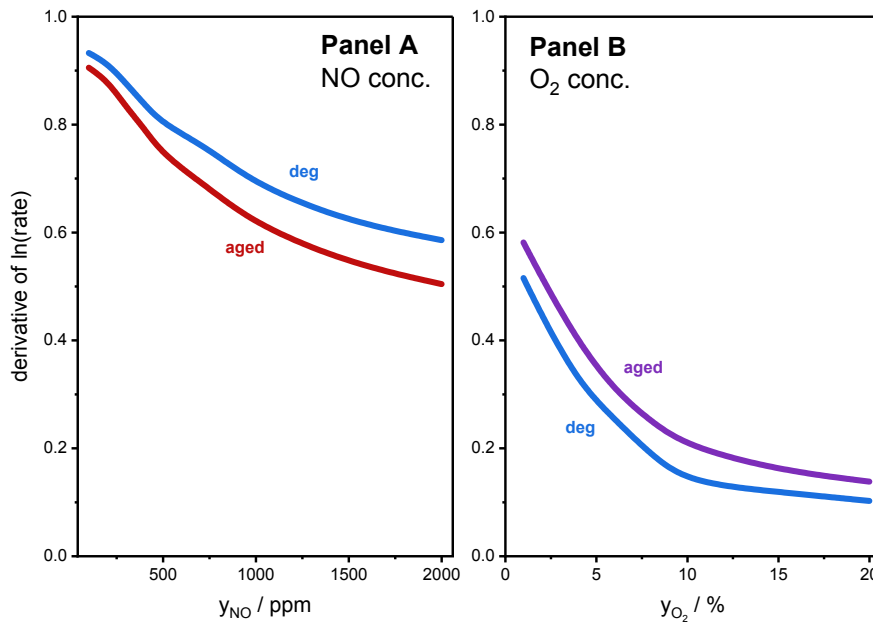

**Figure SI.10** – Derivative of the simulated log<sub>10</sub> r<sub>SCR</sub> versus the (A) NO concentration and (B) O<sub>2</sub> concentration. Feed: GHSV = 450,000 cm<sup>3</sup> h<sup>-1</sup> g<sub>cat</sub><sup>-1</sup> (STP); NO = 500 ppm, NH<sub>3</sub> = 500 ppm, O<sub>2</sub> = 8.0 % v/v and H<sub>2</sub>O = 2.0 % v/v in He, except as noted.

## 6. Combined effect of H<sub>2</sub>O and HTA on RHC, OHC, and Standard-SCR

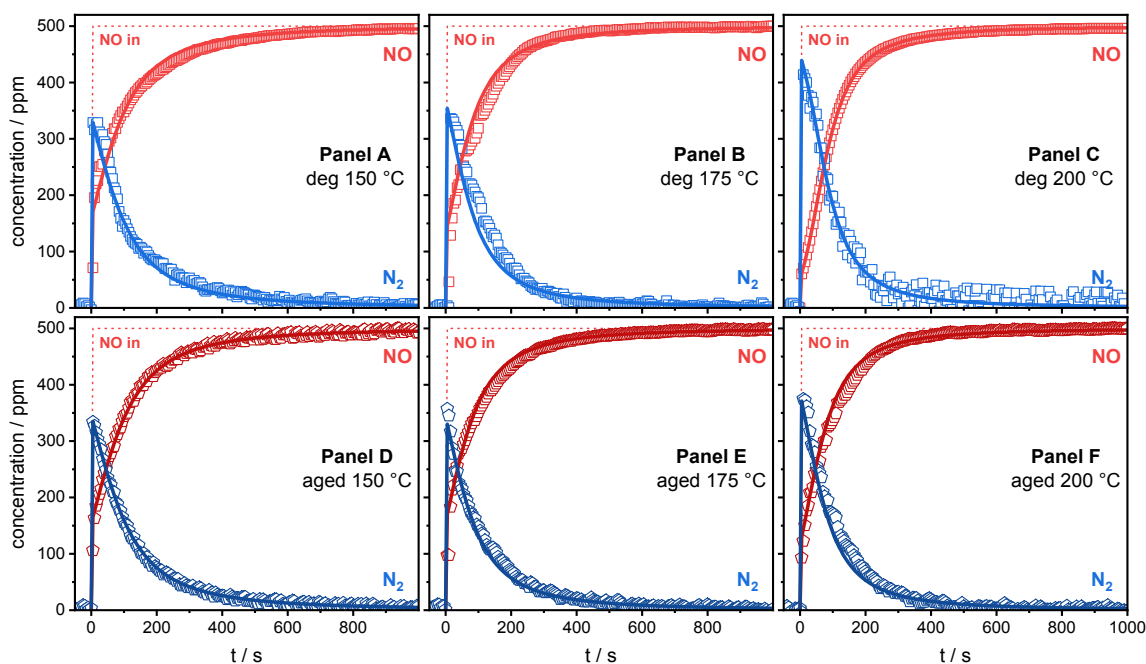

**Figure SI.11** – NO and N<sub>2</sub> dynamics during RHC protocols in dry-gas conditions on Degreened and Aged samples. Panels: A) deg 150 °C, B) deg 175 °C, C) deg 200 °C, D) aged 150 °C, E) aged 175 °C, F) aged 200 °C. Symbols: experimental data (red for NO, blue for N<sub>2</sub>, squares for deg, pentagons for aged). Solid lines: model fit. Feed: GHSV = 450,000 cm<sup>3</sup> h<sup>-1</sup> g<sub>cat</sub><sup>-1</sup> (STP); NO = 500 ppm, NH<sub>3</sub> = 500 ppm and H<sub>2</sub>O = 0.0 % v/v in He.

| $k_{RHC} / s^{-1}$ | Degreened |           | Aged      |           |
|--------------------|-----------|-----------|-----------|-----------|
|                    | Dry       | Wet       | Dry       | Wet       |
| 150 °C             | 7.4 E-03  | 4.6 E-03  | 7.0 E-03  | 4.3 E-03  |
| 175 °C             | 11.0 E-03 | 6.7 E-03  | 10.4 E-03 | 6.9 E-03  |
| 200 °C             | 13.9 E-03 | 10.6 E-03 | 13.1 E-03 | 10.3 E-03 |

**Table SI.3** – RHC rate constants in dry-gas conditions over the Degreened and the Aged samples at the three studied temperatures: 150, 175, and 200 °C. The wet RHC rate constants reported in Table 1 are reproduced here for direct comparison.

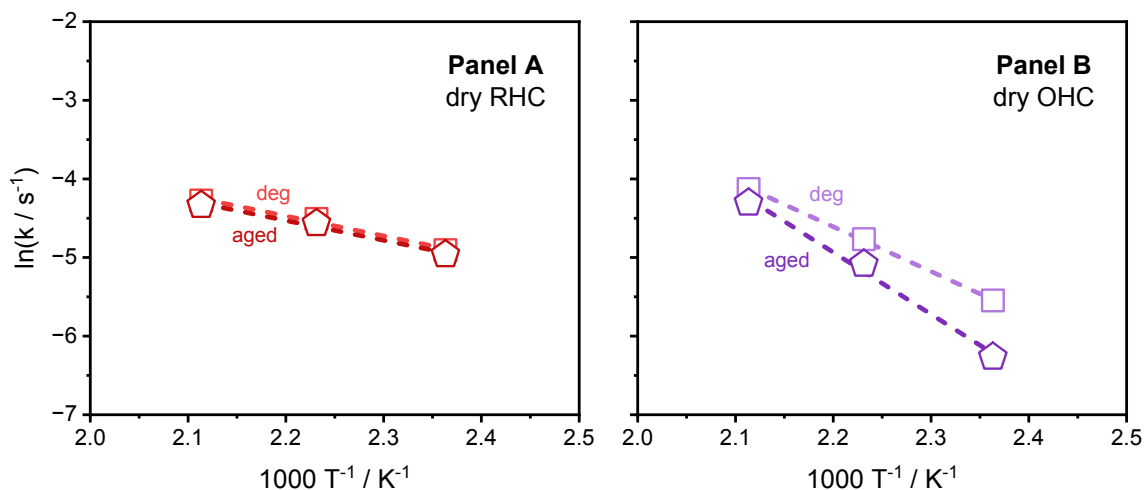

**Figure SI.12** – Arrhenius plot in dry-gas conditions for RHC and OHC, panels (A) and (B) respectively, over the Degreened and the Aged samples. Legend: squares for deg, pentagons for aged.

| Dry Standard-SCR | Exp. (Model) $X_{NO}$ / % |             | Exp. (Model) $\sigma_{ss}$ / % |             |
|------------------|---------------------------|-------------|--------------------------------|-------------|
|                  | Degreened                 | Aged        | Degreened                      | Aged        |
| 150 °C           | 35.1 (34.8)               | 25.3 (25.4) | 44.6 (44.7)                    | 41.5 (41.3) |
| 175 °C           | 54.8 (54.0)               | 49.8 (49.2) | 51.5 (51.7)                    | 47.7 (47.9) |
| 200 °C           | 77.8 (76.8)               | 72.8 (71.0) | 60.0 (60.1)                    | 57.7 (57.7) |

**Table SI.4** – Experimental NO conversion ( $X_{NO}$ ) and bed-average oxidized Cu fraction ( $\sigma_{ss}$ ), during steady-state Standard-SCR in dry-gas conditions over the Degreened and the Aged samples at the three studied temperatures: 150, 175, and 200 °C. In parenthesis the values obtained from the model using the rate constants of Tables SI.5 and SI.7. Feed: GHSV = 450,000 cm<sup>3</sup> h<sup>-1</sup> g<sub>cat</sub><sup>-1</sup> (STP); NO = 500 ppm, NH<sub>3</sub> = 500 ppm, O<sub>2</sub> = 8.0 % v/v, and H<sub>2</sub>O = 0.0 % v/v in He.

| $k_{OHC}$ / s <sup>-1</sup> | Degreened |           | Aged      |           |
|-----------------------------|-----------|-----------|-----------|-----------|
|                             | Dry       | Wet       | Dry       | Wet       |
| 150 °C                      | 3.9 E-03  | 6.7 E-03  | 1.9 E-03  | 2.8 E-03  |
| 175 °C                      | 8.5 E-03  | 13.2 E-03 | 6.2 E-03  | 8.4 E-03  |
| 200 °C                      | 16.1 E-03 | 23.0 E-03 | 13.5 E-03 | 15.9 E-03 |

**Table SI.5** – OHC rate constants in dry-gas conditions over the Degreened and the Aged samples at the three studied temperatures: 150, 175, and 200 °C. The wet OHC rate constants reported in Table 2 are reproduced here for direct comparison.

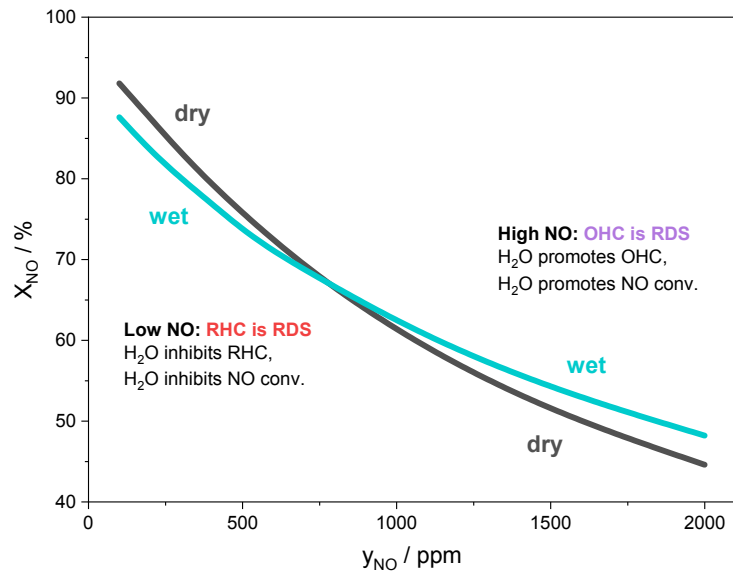

**Figure SI.13** – Simulated NO conversions at 200 °C as a function of feed NO concentration in dry and wet conditions over the Degreened sample. Feed: GHSV = 450,000 cm<sup>3</sup> h<sup>-1</sup> g<sub>cat</sub><sup>-1</sup> (STP); NO = NH<sub>3</sub> = 100-2000 ppm, O<sub>2</sub> = 8.0 % v/v and H<sub>2</sub>O = 0.0-2.0 % v/v in He.
